# Supplementary material
Source: publisher figshare collection journal article supplement (https://sage.figshare.com/ndownloader/files/32394223)
Supplement: Supplementary file 1 [file 32394223]

**Online Appendix**

**United or divided in diversity? The heterogeneous effects of ethnic diversity on European and national identities**

Dominik Schraff and Ronja Sczepanski

*European Union Politics, 2021*

**Content**

Descriptive statistics p.2

Additional OLS regression results p.3

Map of exclusive national identity, binned means p.4

Migrant population in the Netherlands p.5

**Table 1.** Descriptive statistics.

|  | | | | | | | |
| --- | --- | --- | --- | --- | --- | --- | --- |
| Statistic | N | Mean | St. Dev. | Min | Pctl(25) | Pctl(75) | Max |
|  | | | | | | | |
| Age | 1,832 | 55.158 | 17.898 | 16 | 41 | 70 | 94 |
| Tertiary Education | 1,832 | 0.403 | 0.491 | 0 | 0 | 1 | 1 |
| Income | 1,680 | 3,346.382 | 6,581.279 | 0.000 | 1,864.500 | 4,000.000 | 164,714.000 |
| Migrant Background | 1,774 | 0.172 | 0.378 | 0.000 | 0.000 | 0.000 | 1.000 |
| Satisfaction Economy | 1,808 | 6.320 | 1.780 | 0.000 | 5.000 | 8.000 | 10.000 |
| Exclusive National Identity | 1,832 | 2.897 | 2.578 | -6 | 1 | 4 | 10 |
| National Identity | 1,832 | 7.618 | 2.003 | 0 | 7 | 9 | 10 |
| EU Identity | 1,832 | 4.721 | 2.518 | 0 | 3 | 7 | 10 |
| Border Distance, thousands | 1,821 | 21.219 | 15.973 | 0.000 | 7.802 | 31.020 | 65.366 |
| ∆ Non-Western (%) | 1,811 | 1.973 | 2.289 | -11.661 | 0.936 | 2.927 | 16.000 |
| ∆ Western (%) | 1,811 | 1.088 | 1.822 | -8.000 | 0.000 | 1.776 | 15.204 |
| Western (%) | 1,821 | 10.352 | 5.488 | 0.000 | 6.876 | 12.398 | 53.014 |
| Non-Western (%) | 1,821 | 12.091 | 11.901 | 0.000 | 4.247 | 15.185 | 84.093 |
| Population, thousands | 1,821 | 8.588 | 4.827 | 0.040 | 5.330 | 11.455 | 41.770 |
| Neighboring Western (%) | 1,821 | 9.860 | 4.692 | 1.461 | 6.622 | 12.001 | 35.514 |
| Neighboring Non-Western (%) | 1,821 | 10.825 | 9.374 | 0.200 | 4.211 | 13.825 | 60.000 |

**Table 2.** Additional OLS regression results.

|  | (1) | (2) | (3) | (4) |
| --- | --- | --- | --- | --- |
| Log Non-Western | 1.310*** | 1.167*** | 1.308*** | 1.285*** |
|  | (0.435) | (0.441) | (0.442) | (0.442) |
|  |  |  |  |  |
| Log Western | 0.046 | 0.213 | 0.218 | 0.092 |
|  | (0.362) | (0.387) | (0.419) | (0.360) |
|  |  |  |  |  |
| Area Wealth | 0.167** | 0.118 | 0.138* | 0.125* |
|  | (0.074) | (0.088) | (0.078) | (0.075) |
|  |  |  |  |  |
| Border Distance | 0.004 | 0.010* | 0.004 | 0.005 |
|  | (0.004) | (0.006) | (0.004) | (0.004) |
|  |  |  |  |  |
| ∆ Non-Western | -0.059* | -0.066** | -0.049 | -0.046 |
|  | (0.031) | (0.031) | (0.031) | (0.031) |
|  |  |  |  |  |
| ∆ Western | 0.061 | 0.055 | 0.056 | 0.057 |
|  | (0.043) | (0.045) | (0.043) | (0.043) |
|  |  |  |  |  |
| Satisfaction with Economy | -0.084** | -0.084** |  |  |
|  | (0.037) | (0.037) |  |  |
|  |  |  |  |  |
| Log Neighboring Western |  |  | -0.209 |  |
|  |  |  | (0.353) |  |
|  |  |  |  |  |
| Log Neighboring Non-Western |  |  | 0.026 |  |
|  |  |  | (0.177) |  |
|  |  |  |  |  |
| Area Population |  |  |  | 0.013 |
|  |  |  |  | (0.016) |
|  |  |  |  |  |
| Log Non-Western*Log Western | -0.434** | -0.420** | -0.447** | -0.455** |
|  | (0.178) | (0.180) | (0.183) | (0.177) |
|  |  |  |  |  |
| Constant | 3.105*** | 2.898*** | 2.692*** | 2.526*** |
|  | (0.831) | (0.909) | (0.844) | (0.788) |
|  |  |  |  |  |
| Individual-Level Covariates | Yes | Yes | Yes | Yes |
| Province Fixed Effects | No | Yes | No | No |
| Observations | 1,584 | 1,584 | 1,605 | 1,605 |
| R2 | 0.067 | 0.089 | 0.065 | 0.065 |
| Adjusted R2 | 0.059 | 0.074 | 0.056 | 0.057 |
| *Note:* *p<0.1; **p<0.05; ***p<0.01; ∆ = temporal change 2010-2019 | | | | | |

**Figure 1.** Map of exclusive national identity, binned means.


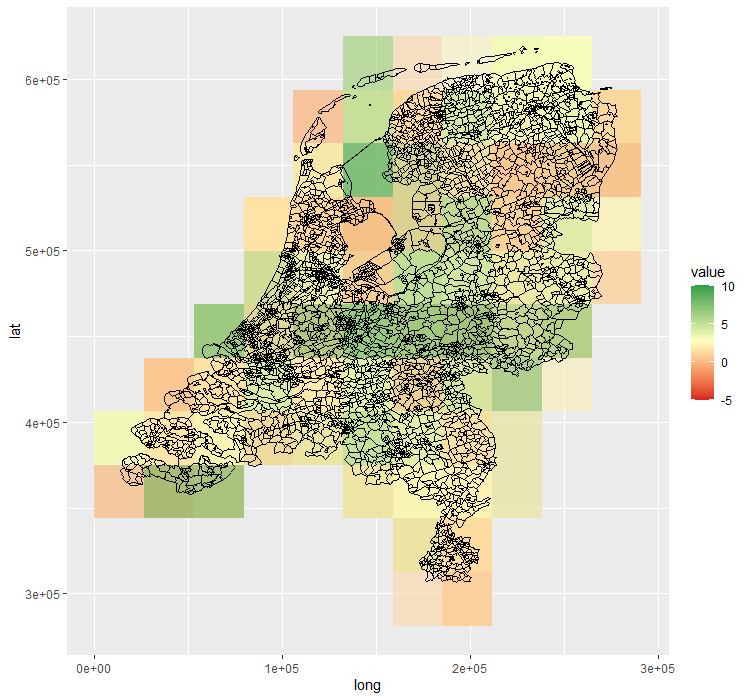


**Table 3.** Migrant population in the Netherlands 2020.

| Total | 17,407,585 |
| --- | --- |
| Dutch background | 13,186,880 |
| With migration background | 4,220,705 |
| Africa | 714,732 |
| America | 719,601 |
| Asia | 969,98 |
| Europe (excluding Dutch background) | 1,791,850 |
| Oceania | 24,542 |
| European Union (excl. Dutch background) | 1,176,651 |
| Caribbean Netherlands | 79 |
| Indonesia | 356,029 |
| Morocco | 408,864 |
| Surinam | 356,402 |
| Turkey | 416,864 |

*Source*: [Statistics Netherlands](https://www.cbs.nl/en-gb/society/population).
